# Supplementary material
Source: publisher site journal article supplement (https://www.dovepress.com/article/445632)
Supplement: Supplementary file 1 [file get_supplementary_file.php]

**Supplementary Material**

**Key Points in Tuberculosis Prevention and Control**

**I. Pulmonary Tuberculosis is a Chronic Infectious Disease with Long-Term and Severe Health Consequences**

1. Tuberculosis, also known as "consumption," is caused by Mycobacterium tuberculosis, primarily affecting the lungs, leading to pulmonary tuberculosis.
2. In China, pulmonary tuberculosis ranks second in both incidence and mortality among statutory class A and B infectious diseases.
3. If pulmonary tuberculosis is not promptly detected and thoroughly treated, it can cause serious harm to health, leading to respiratory failure and death, imposing a heavy economic burden on patients and their families.

**II. Pulmonary Tuberculosis Mainly Spreads through the Respiratory Tract, Posing a Risk to Everyone**

1. Pulmonary tuberculosis is a respiratory infectious disease, easily transmitted.
2. Patients with pulmonary tuberculosis spread Mycobacterium tuberculosis into the air through coughing, sneezing, and sputum production, and healthy individuals inhaling contaminated droplets may become infected.
3. Those living, working, or studying closely with pulmonary tuberculosis patients are considered close contacts and may get infected, necessitating timely examination at a hospital for exclusion.
4. People with conditions such as HIV infection, immunodeficiency, diabetes, pneumoconiosis, and the elderly are more susceptible to the disease and should undergo regular tuberculosis screening.

**III. Persistent Coughing and Sputum Production for More Than 2 Weeks Warrant Suspected Pulmonary Tuberculosis, Requiring Timely Medical Attention**

1. Common symptoms of pulmonary tuberculosis include persistent coughing and sputum production. If these symptoms last for more than 2 weeks, there should be a high suspicion of pulmonary tuberculosis, and immediate medical attention is required.
2. Pulmonary tuberculosis may also present with blood-tinged sputum, low-grade fever, night sweats, afternoon fever, chest pain, fatigue, weight loss, and difficulty breathing.
3. Suspected pulmonary tuberculosis cases should promptly seek medical attention at the designated tuberculosis healthcare institution in the local area, available at the county (district, banner), city, and provincial levels.

**IV. Avoid Spitting, Cover the Mouth and Nose When Coughing or Sneezing; Wearing Masks Can Reduce the Spread of Pulmonary Tuberculosis**

1. Patients with pulmonary tuberculosis should avoid spitting in public places and cover their mouth and nose when coughing or sneezing.
2. Patients should not spit sputum indiscriminately and should dispose of it in a covered sputum cup with disinfectant. If not feasible, they can spit into disinfected wet tissues or sealed sputum bags.
3. Patients with pulmonary tuberculosis should avoid crowded public places, and if necessary, they should wear masks.
4. Pulmonary tuberculosis can be prevented and treated. Strengthening nutrition to enhance the body's resistance is helpful in preventing pulmonary tuberculosis.

**V. Standardized Full-Course Treatment; Most Patients Can Be Cured, Preventing Transmission to Others**

1. The full course of treatment for pulmonary tuberculosis is 6-8 months, and drug-resistant pulmonary tuberculosis requires treatment for 18-24 months.
2. Adhering to the doctor's requirements for standardized treatment allows the majority of patients with pulmonary tuberculosis to be cured, promoting personal recovery and protecting family members.
3. Patients with pulmonary tuberculosis who do not follow standardized treatment may develop drug-resistant pulmonary tuberculosis, which has a low cure rate, high treatment costs, and significant social harm.

**Correct Way to Wear Surgical Masks:**

1. Put on the mask with the metal strip facing upward.

2. Secure the headbands behind the head and neck.

3. Press the metal strip inward to form a nose shape.

4. Ensure the mask covers from the nose to the chin, snug against the face.

**Incorrect Ways to Wear Surgical Masks:**

1. Hang the mask around the neck as an accessory.

2. Do not cover the nose with the mask.

3. Do not cover the lower jaw with the mask.
